# Supplementary material for: A yellowish-green-light-controllable nitric oxide donor based on N-nitrosoaminophenol applicable for photocontrolled vasodilation
Source: Royal Society of Chemistry journal article supplement (doi:10.1039/c7ob00245a), 2017-01-01
Supplement: c7ob00245a1.pdf [file c7ob00245a1.pdf]

## Electronic Supplementary Information

### **A Yellowish-Green-Light-Controllable Nitric Oxide Donor Based on *N*-Nitrosoaminophenol Applicable for Photocontrolled Vasodilation**

Hana Okuno, Naoya Ieda, Yuji Hotta, Mitsuyasu Kawaguchi, Kazunori Kimura, and Hidehiko Nakagawa

#### Contents

1. Experimental section
  - A. <sup>1</sup>H NMR chart of **NO-Rosa**
  - B. Experimental procedure
2. Figures for supporting data

## 1. Experimental Section

### A. $^1\text{H}$ NMR chart of NO-Rosa

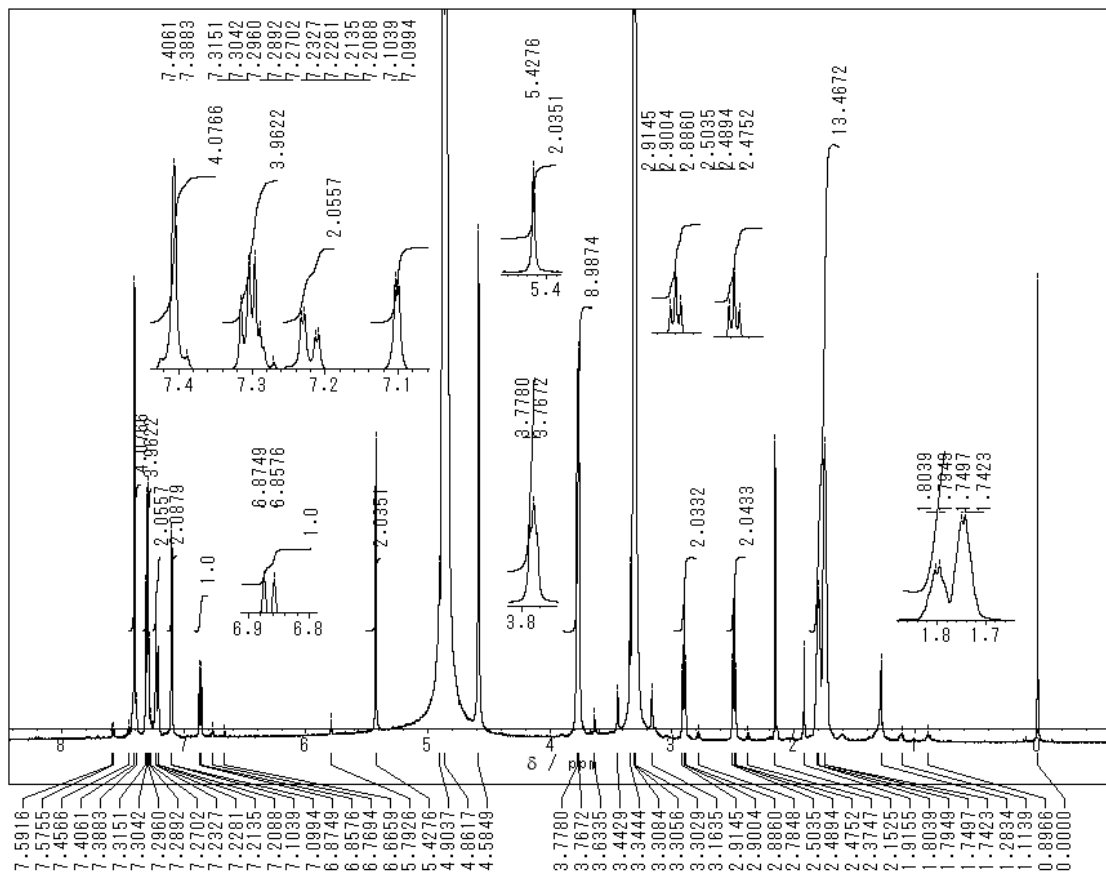

### B. Experimental procedure

#### $\text{NO}_2^-/\text{NO}_3^-$ detection with a NO fluorescence probe DAN

Sample solutions of **NO-Rosa**, (10  $\mu\text{M}$ , 1 mL) were photoirradiated at room temperature for 60 min. Photoirradiation was performed with an MAX-302 (Asahi spectra) equipped with a 530–590 nm band-pass filter (190  $\text{mW}/\text{cm}^2$  at 570 nm) for **NO-Rosa**. The calibration curve was prepared by using  $\text{NaNO}_3$  standard solution and DAN. After reducing  $\text{NO}_2^-$  to  $\text{NO}_3^-$  by  $\text{NO}_3^-$  reductase, concentration of  $\text{NO}_3^-$  in the photoirradiated **NO-Rosa** solution was determined by comparing the fluorescence intensity of naphthalenetriazole with the calibration curve. The fluorescence intensity was recorded on an ARVO-X5 (Perkinelmer) at  $\lambda_{\text{ex}} = 355 \text{ nm}/\lambda_{\text{fl}} = 460 \text{ nm}$ .

#### HPLC analysis of photodecomposition of NO-Rosa

NO-Rosa was dissolved in MilliQ water containing 1% DMSO as a cosolvent to prepare 100  $\mu\text{M}$  **NO-Rosa** solution, and this solution was photoirradiated (530–590 nm, 60  $\text{mW}/\text{cm}^2$ , 15 min).

Detection was done at 565 nm. Gradient conditions: 0 min MeCN (0.1% FA) 30% → 15 min MeCN (0.1% FA) 50% → 20 min MeCN (0.1% FA) 50%; the other solvent was H<sub>2</sub>O (0.1% FA).

### LC-MS analysis of photodecomposition products of NO-Rosa

**NO-Rosa** (100 μM in MilliQ water containing 10% DMSO, 1 mL) was irradiated with yellowish green light (530–590 nm, 140 mW/cm<sup>2</sup>, 15 min), and the solution was analyzed by LC-MS. Detection was done at 565 nm. Gradient conditions: 0 min MeCN (0.1% FA) 30% → 15 min MeCN (0.1% FA) 50% → 20 min MeCN (0.1% FA) 50%; the other solvent was H<sub>2</sub>O (0.1% FA).

### Light-toxicity assay for HEK293 cells

Cell viability was verified by Cell Counting Kit-8 (Dojindo, Kumamoto). HEK293 cells were plated on 96-well plates (100 μL, 1.0×10<sup>4</sup> cells /well). After incubation under 5% CO<sub>2</sub> atmosphere at 37 °C for 24 hr, the cells were irradiated by yellowish green light (530–590 nm, 40 mW/cm<sup>2</sup>, 15 min) or blue light (470–500 nm, 40 mW/cm<sup>2</sup>, 15 min) with MAX-302 (Asahi Spectra). After irradiation, the cells were incubated another 48 hr under 5% CO<sub>2</sub> atmosphere at 37 °C. CCK solution (10 μL) was added to each well and the cells were incubated for 2 hr under 5% CO<sub>2</sub> atmosphere at 37 °C. The absorption intensity at 450 nm was recorded on an ARVO-X5 (Perkinelmer). Cell viability (%) was determined by dividing the absorption intensity of irradiated group by the absorption intensity of the group without photoirradiation.

## 2. Figures for supporting data

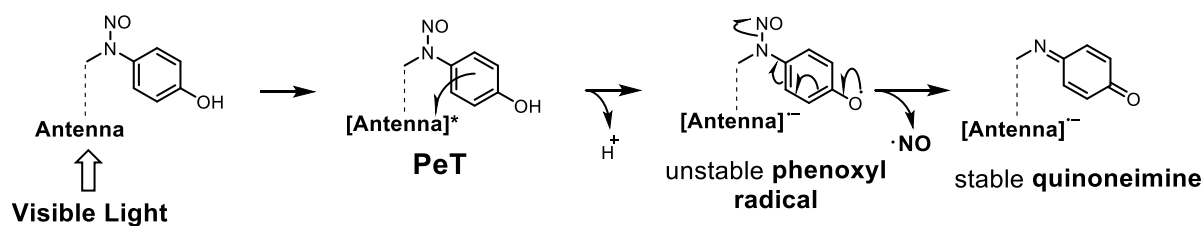

**Figure S1** Proposed mechanism of NO release from NOBL-1 (1) / NO-Rosa (2)

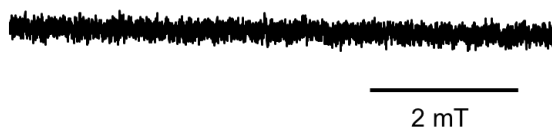

**Figure S2** ESR spectrum of a solution of Fe-MGD and **NO-Rosa** without photoirradiation. **NO-Rosa** (100  $\mu\text{M}$ ), MGD (6 mM), and  $\text{FeSO}_4$  (1.5 mM) were dissolved in MilliQ water containing 15% DMSO, and the ESR spectrum of the solution was measured without photoirradiation. ESR conditions: microwave power, 10 mW; frequency, 9.4 GHz; field, 330 mT; sweep width, 7.5 mT; sweep time, 4 min; modulation width, 0.125 mT; time constant, 0.10 s.

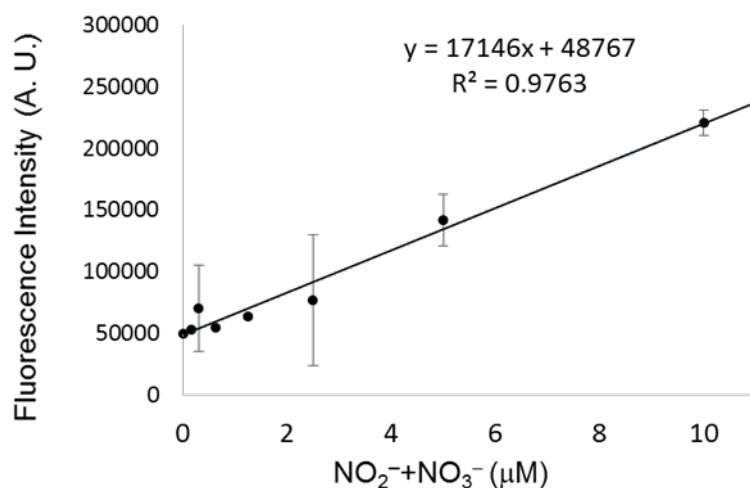

|         | Fluorescence Intensity (A. U.) | NO Concentration ( $\mu\text{M}$ ) |
|---------|--------------------------------|------------------------------------|
|         | Mean $\pm$ SD                  |                                    |
| NO-Rosa | 216068 $\pm$ 3522              | 9.8 $\pm$ 0.2                      |

**Figure S3** Quantitative analysis of NO release from **NO-Rosa** by DAN. A solution of **NO-Rosa** (10  $\mu\text{M}$ , 1 mL) was photoirradiated at room temperature for 60 min. Visible light photoirradiation was performed with an Asahi Spectra MAX-302 equipped with a 530–590 nm band-pass filter (190  $\text{mW}/\text{cm}^2$  at 570 nm).  $\text{NO}_2/\text{NO}_3$  were detected by using a 2,3-diaminonaphthalene (DAN) fluorometric assay kit.

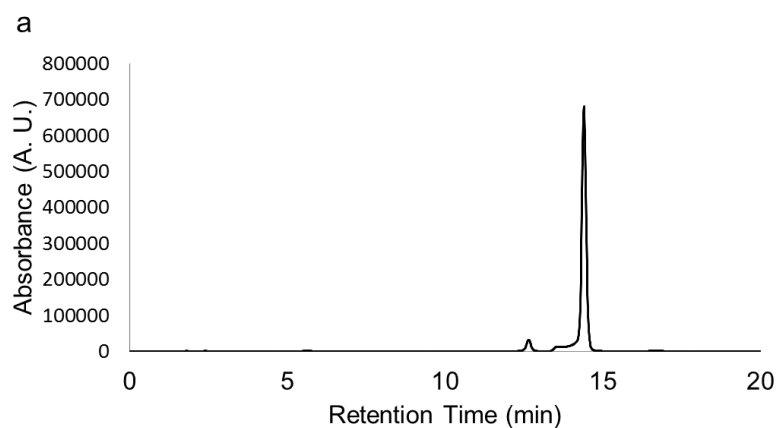

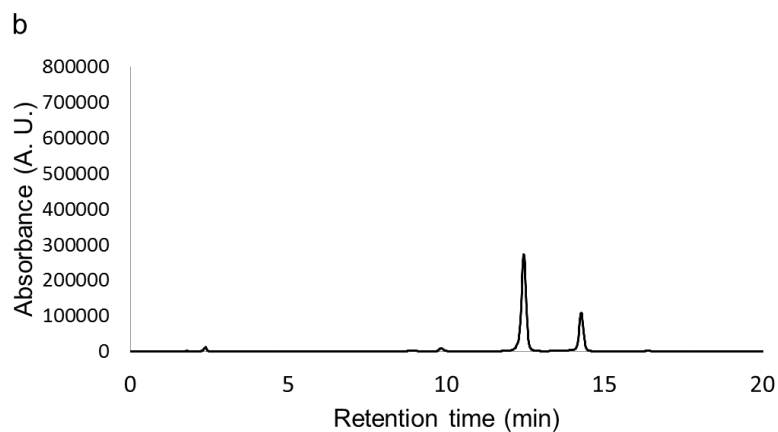

**Figure S4** HPLC analysis of photodecomposition. Chromatograms of solution containing NO-Rosa (a) before photoirradiation, and (b) after photoirradiation. **NO-Rosa** was dissolved in MilliQ water containing 1% DMSO as a cosolvent to prepare 100  $\mu$ M **NO-Rosa** solution, and this solution was photoirradiated (530–590 nm, 60 mW/cm<sup>2</sup>, 15 min). Detection was done at 565 nm. Gradient conditions: 0 min MeCN (0.1% FA) 30% → 15 min MeCN (0.1% FA) 50% → 20 min MeCN (0.1% FA) 50%; the other solvent was H<sub>2</sub>O (0.1% FA).

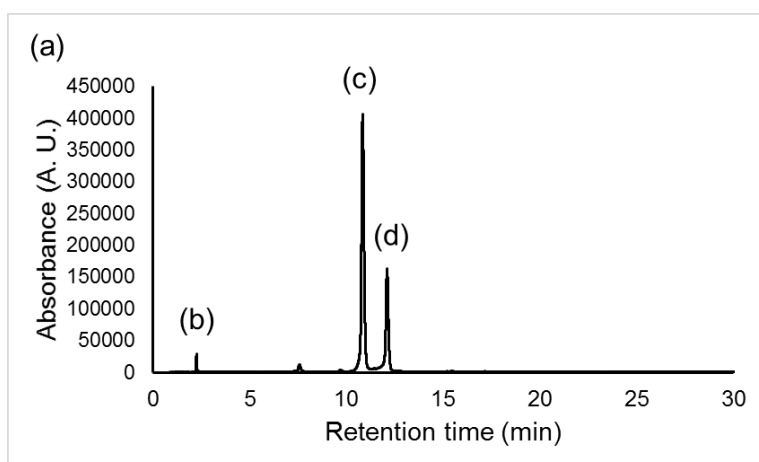

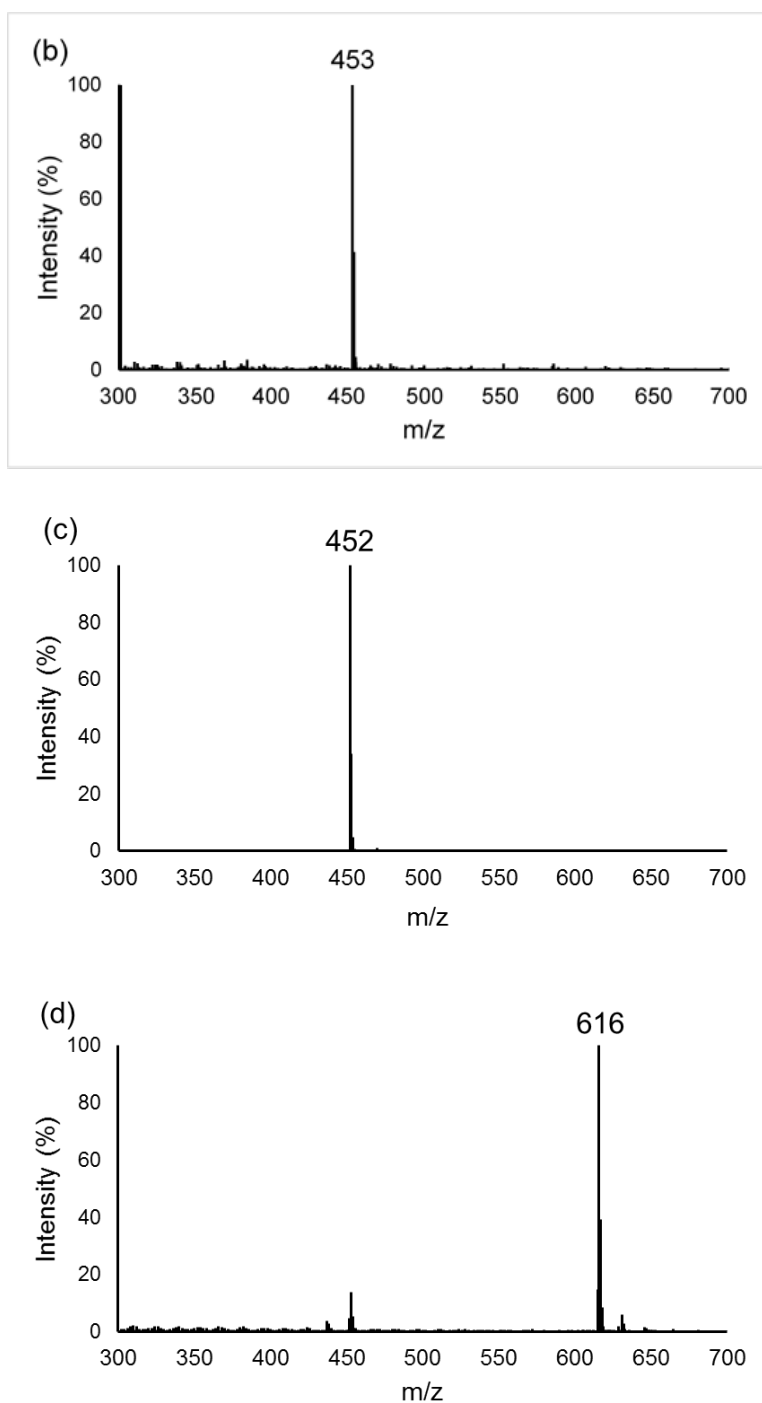

**Figure S5** LC-MS analysis of photodecomposition products of **NO-Rosa**

**NO-Rosa** (100  $\mu\text{M}$  in MilliQ water containing 10% DMSO, 1 mL) was irradiated with yellowish green light (530–590 nm, 140  $\text{mW}/\text{cm}^2$ , 15 min), and the solution was analyzed by LC-MS. (a) Detection was done at 565 nm. Gradient conditions: 0 min MeCN (0.1% FA) 30%  $\rightarrow$  15 min MeCN (0.1% FA) 50%  $\rightarrow$  20 min MeCN (0.1% FA) 50%; the other solvent was  $\text{H}_2\text{O}$  (0.1% FA). Mass spectra of photodecomposition products at (b) 2 min (**S1**), (c) 11 min (intermediate **9**), (d) 12 min

(intermediate **11**) are shown.

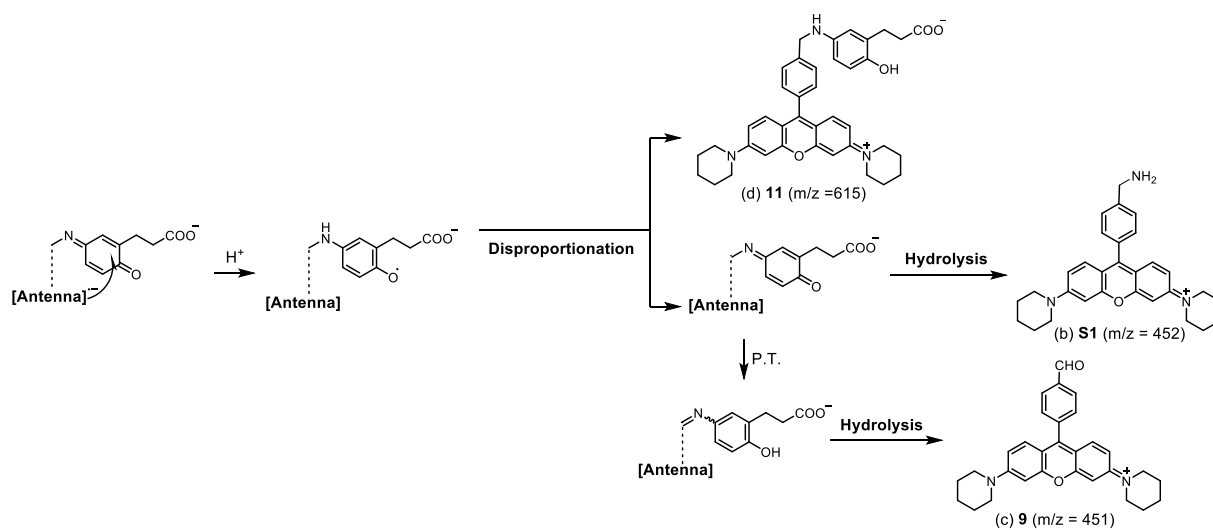

**Figure S6** Proposed decomposition mechanism of NO-Rosa

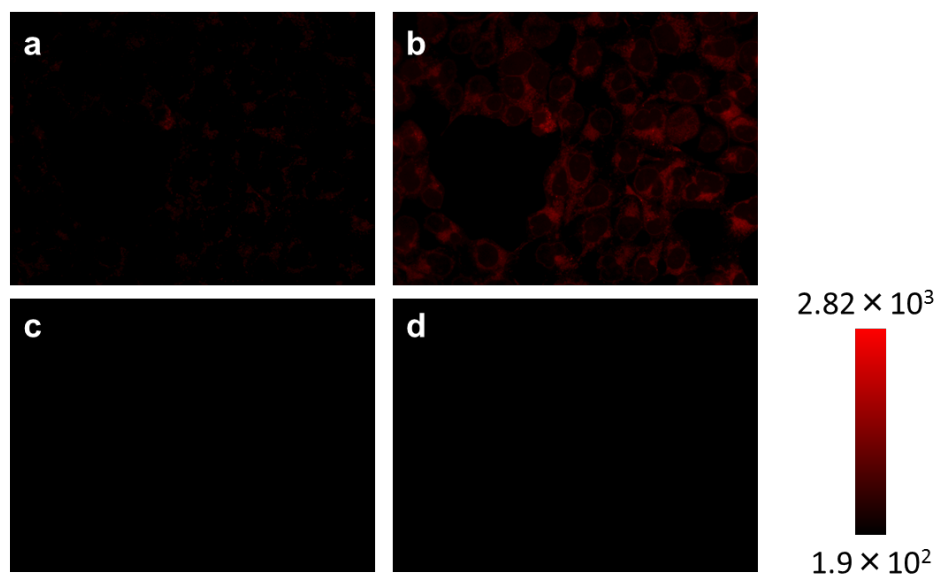

**Figure S7** Red fluorescence images of each sample corresponding to (a)–(d) of Figure 4 (photocontrolled NO release in HEK293 cells).

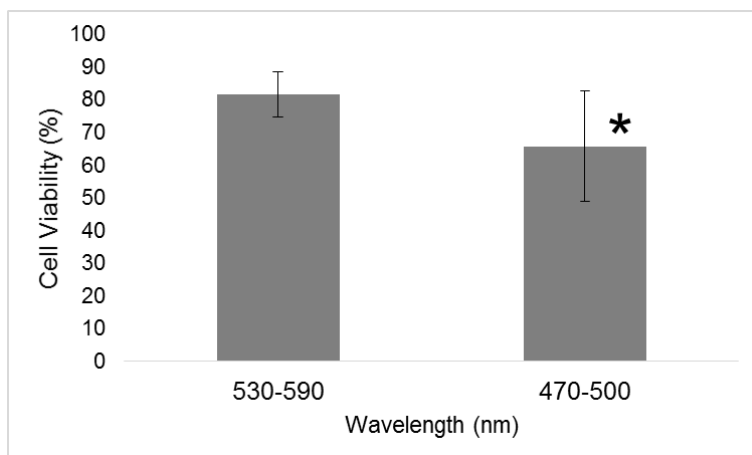

**Figure S8** HEK293 cell viability determined by Cell Counting Kit-8 after irradiation by different wavelength light. HEK293 cells were irradiated by yellowish green light (530–590 nm, 40 mW/cm<sup>2</sup>, 15 min) or by blue light (470–500 nm, 40 mW/cm<sup>2</sup>, 15 min). Cell viability was determined by Cell Counting Kit-8. Cell viability after each wavelength range was; 530–590 nm: 82 ± 7%, 470–500 nm: 66 ± 17%, n = 9, \**p* = 0.026 (Student's *t*-test).

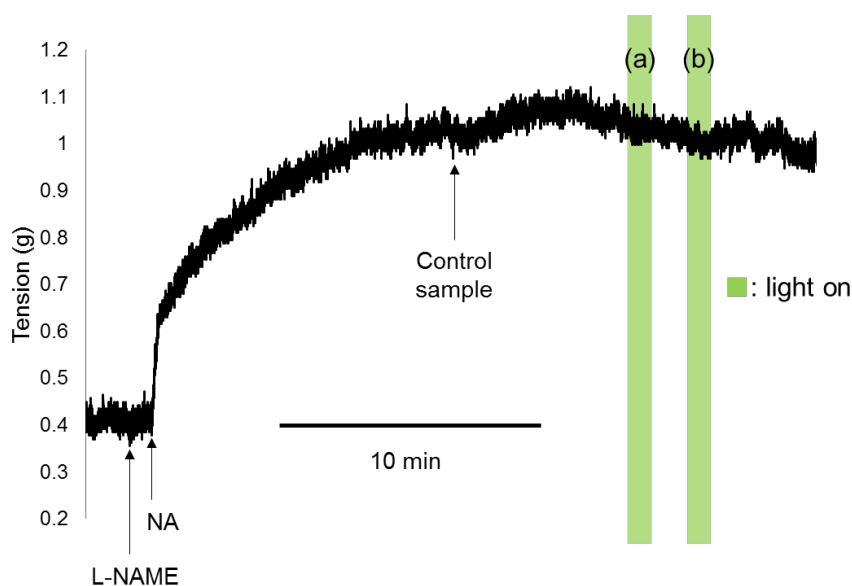

**Figure S9** Vasodilation test with photodecomposed sample. **NO-Rosa** (1 mM in MilliQ water containing 10% DMSO) was decomposed by pre-irradiation with yellowish green light (530–590 nm, 170 mW/cm<sup>2</sup>, 30 min). A rat aortic strip was placed in a Magnus tube filled with Krebs buffer at 37 °C. The strip was then pretreated with L-NAME (10 μM) and noradrenaline (10 μM). After equilibration, the photodecomposed sample (originally 10 μM **NO-Rosa**) was added to the tube. The strip was irradiated with a light source (MAX-303, Asahi Spectra) equipped with a 530–590 nm band-pass filter for 1 min periods as shown. The light intensity at the each irradiation of was (a) 65 mW/cm<sup>2</sup>, (b) 130 mW/cm<sup>2</sup>.
